# Supplementary material
Source: PubMed Central journal article supplement (PMC2736335)
Supplement: NIHMS80566-supplement-Supplimental.pdf [file NIHMS80566-supplement-Supplimental.pdf]

# Supporting Information

*for*

## Geometric Structure Determination of N694C

# Lipoxygenase: A Comparative Near-Edge and EXAFS Study

*Ritimukta Sarangi,<sup>§</sup> Rosalie K. Hocking,<sup>†</sup> Michael L. Neidig,<sup>†</sup> Maurizio Benfatto,<sup>\*,‡</sup> Theodore R  
Holman,<sup>‡</sup> Edward I. Solomon,<sup>†,§</sup> Keith O. Hodgson,<sup>†,§</sup> Britt Hedman<sup>\*,§</sup>*

<sup>†</sup>Department of Chemistry, Stanford University, Stanford, CA, 94305, USA

<sup>‡</sup>Laboratori Nazionali di Frascati dell' INFN, C.P. 13, 00044 Frascati, Italy

<sup>‡</sup>Department of Chemistry and Biochemistry, University of California, Santa Cruz, California 95064

<sup>§</sup>Stanford Synchrotron Radiation Laboratory, SLAC, Stanford University, Stanford, CA, 94309, USA

\* Authors to whom correspondence should be addressed.

E-mail: [hedman@ssrl.slac.stanford.edu](mailto:hedman@ssrl.slac.stanford.edu) (B.H.); [Maurizio.Benfatto@lnf.infn.it](mailto:Maurizio.Benfatto@lnf.infn.it) (M.B).

RECEIVED DATE (to be automatically inserted after your manuscript is accepted if required according to the journal that you are submitting your paper to)

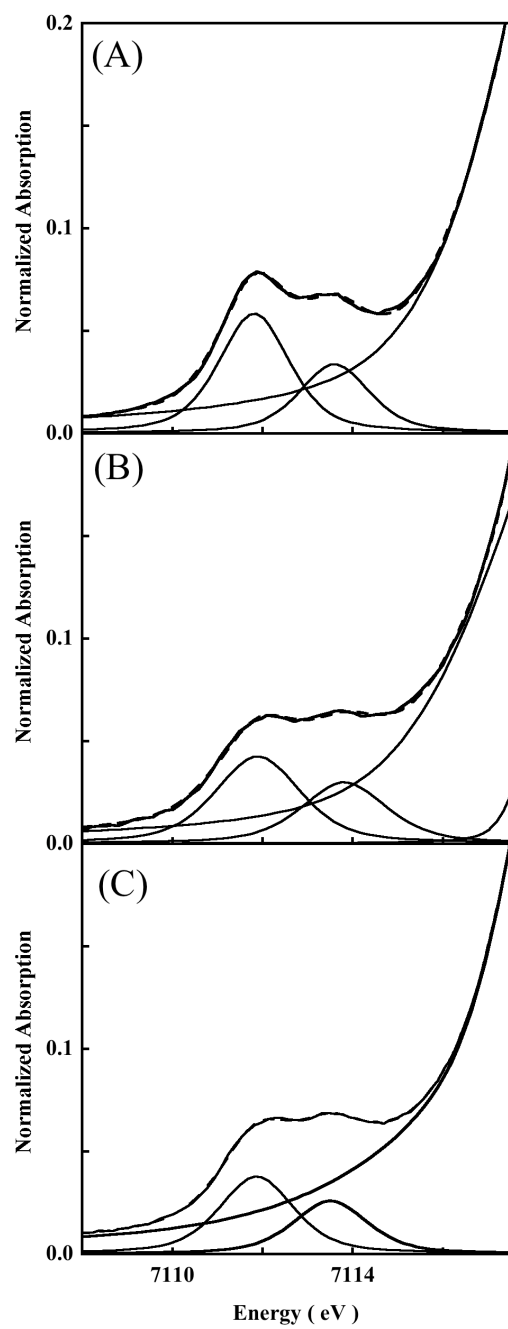

**Figure S1.** Pseudo-Voigt fits to the Fe K-pre-edge data. PAH<sup>R</sup> (A), PAH<sup>T</sup> (B) and N694C Lipoxygenase (C).

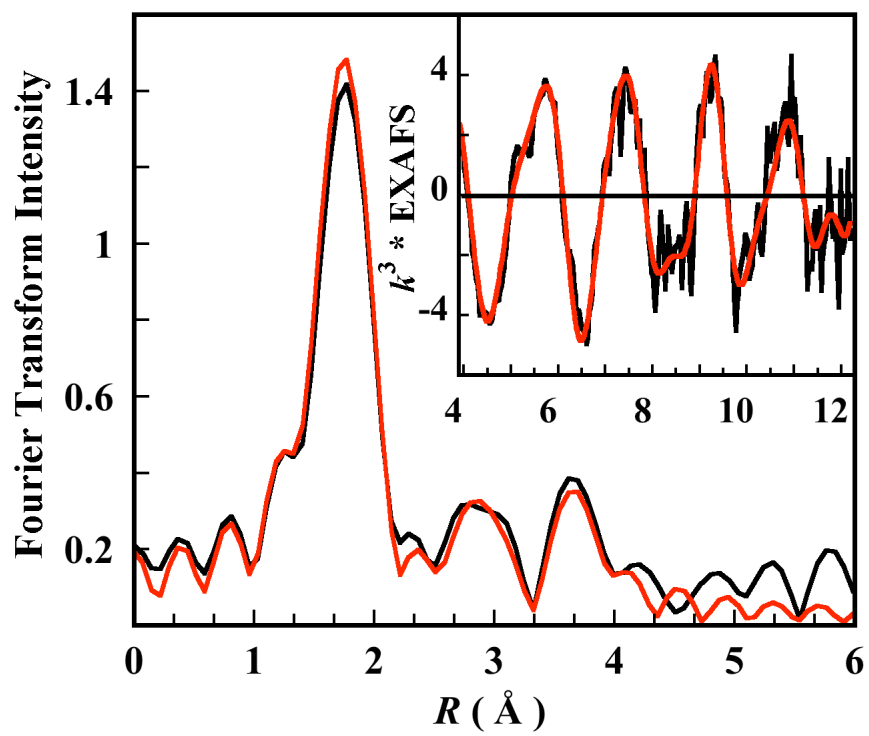

**Figure S2.** Fourier transforms (non phase shift corrected) and EXAFS data (Inset) for WT sLO1. Data (—), Fit (—).

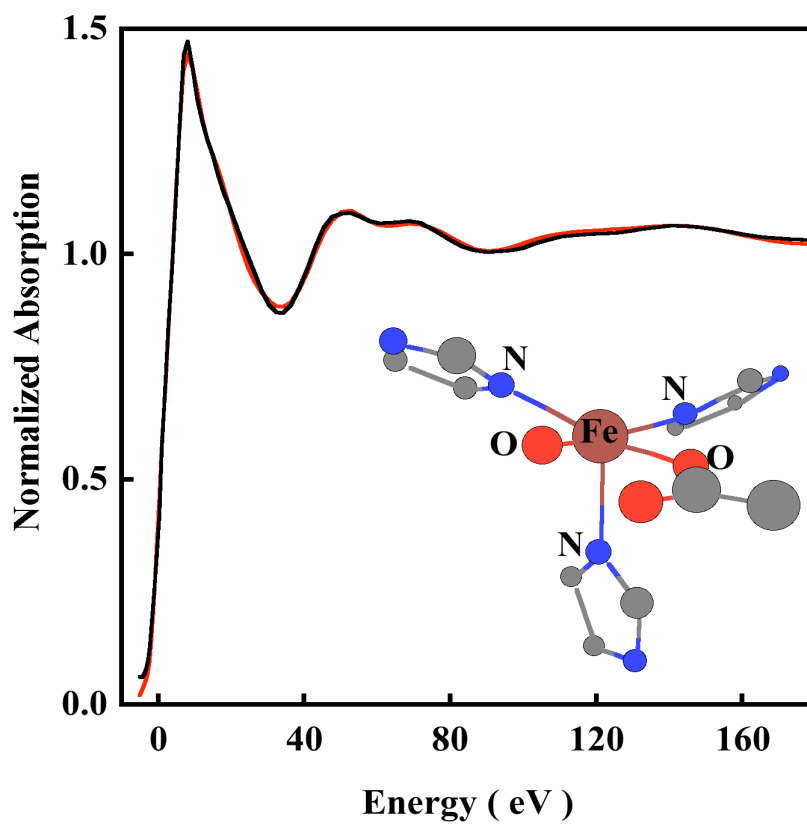

**Figure S3.** The normalized Fe K near-edge spectrum of N694C (—) and the best fit (—) obtained from the optimization of both structural and non-structural parameters for the WT 5C model.

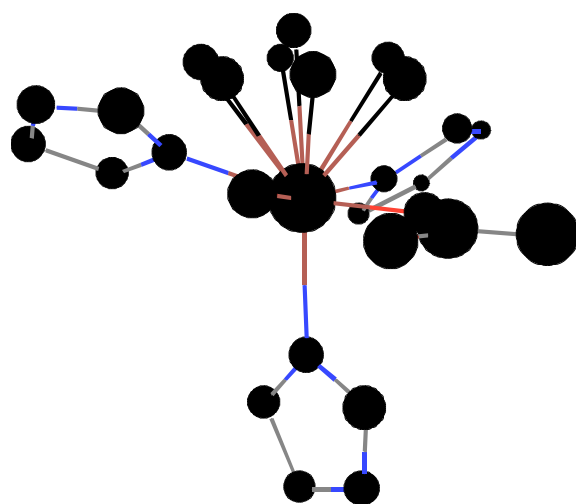

**Figure S4.** Six coordinate input structures for the Fe-O near edge simulations. Seven input structures each with one axial O atom (shown in black) were created to test for the possibility of a strong angular dependence of the axial water ligand.

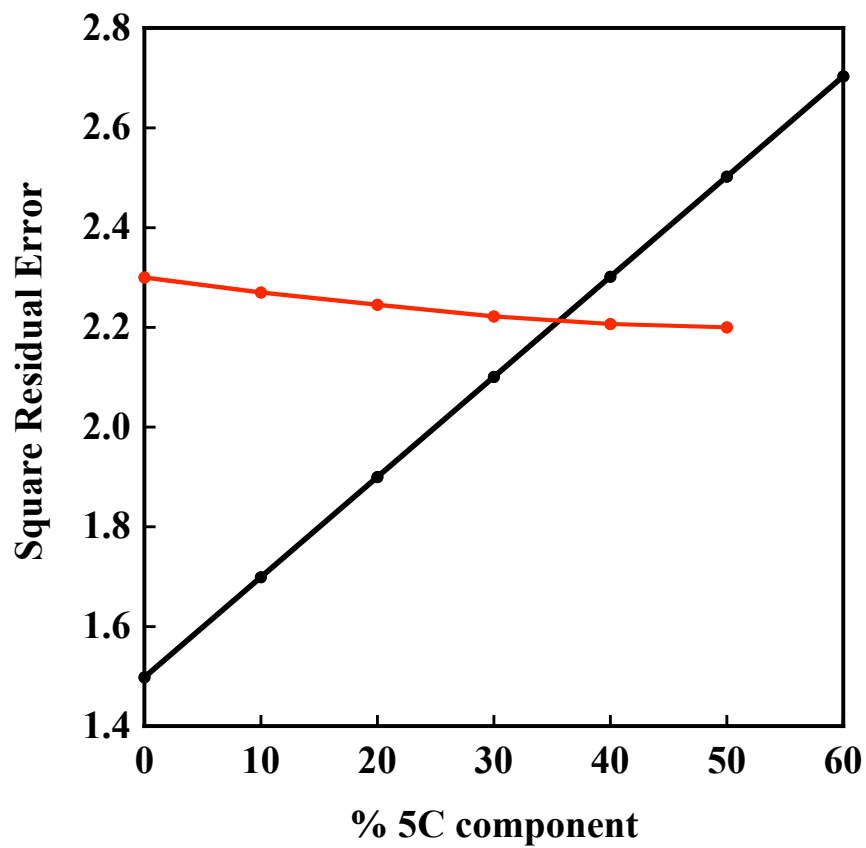

**Figure S5.** Change in square residual error with an increase in 5C/6C ratio. Error obtained from MXAN near-edge analysis (—). Error obtained from EXAFS analysis (—).

**Table S1.** EXAFS least squares fitting results for WT sLO.

| Coordination/Path | R(Å) <sup>a</sup> | σ <sup>2</sup> (Å <sup>2</sup> ) <sup>b</sup> | E <sub>0</sub> (eV) | F <sup>c</sup> |
|-------------------|-------------------|-----------------------------------------------|---------------------|----------------|
| 6 Cu-N/O          | 2.18              | 473                                           |                     |                |
| 6 Cu-C            | 3.17              | 662                                           |                     |                |
| 12 Cu-N-C         | 3.30              | 208                                           | -2.58               | 0.57           |
| 12 Cu-N/C-N/C     | 3.95              | 591                                           |                     |                |
| 16 Cu-N/C-N/C     | 4.08              | 179                                           |                     |                |

<sup>a</sup> The estimated standard deviations for the distances are in the order of ± 0.02 Å. <sup>b</sup>The σ<sup>2</sup> values are multiplied by 10<sup>5</sup>. <sup>c</sup> Error is given by  $\Sigma[(\chi_{\text{obsd}} - \chi_{\text{calcd}})^2 k^6] / \Sigma[(\chi_{\text{obsd}})^2 k^6]$ .

**Table S2.** Fe K edge analysis.

| Path  | Fe-O | Fe-O <sup>b</sup> | Fe-N <sub>eq</sub> | Fe-N <sub>eq</sub> | Fe-N <sub>ax</sub> |
|-------|------|-------------------|--------------------|--------------------|--------------------|
| R (Å) | 2.03 | 2.01              | 2.13               | 2.19               | 2.38               |

<sup>a</sup> The structural and non-structural parameters are obtained by alternate fitting of each set of parameters separately. This is possible due to the low correlation between these parameters. N<sub>ax</sub>=axial N(His), N<sub>eq</sub>=equatorial N(His). <sup>b</sup> Fe-OCO (Ile).





Cartesian coordinates of the refined Fe/S and Fe/O structures obtained from full multiple scattering near-edge calculations.

**Fe/O Model Final-Fit**

|    |        |        |        |       |
|----|--------|--------|--------|-------|
| Fe | 0.000  | 0.000  | 0.000  | 0.000 |
| O  | -0.921 | -0.210 | 1.869  | 2.094 |
| N  | -1.937 | 0.517  | -0.853 | 2.179 |
| O  | 1.756  | -0.184 | 1.184  | 2.126 |
| N  | 1.290  | 0.851  | -1.488 | 2.145 |
| N  | -0.092 | -2.318 | -0.759 | 2.441 |
| O  | 0.000  | 2.846  | 0.446  | 2.880 |
| C  | 1.909  | -0.489 | 2.406  | 3.110 |
| O  | 0.959  | -0.802 | 3.157  | 3.396 |
| C  | 3.316  | -0.483 | 3.011  | 4.505 |
| C  | -2.547 | 0.218  | -2.050 | 3.277 |
| C  | -2.852 | 0.952  | -0.006 | 3.007 |
| C  | -3.865 | 0.483  | -1.904 | 4.335 |
| N  | -4.024 | 0.942  | -0.614 | 4.178 |
| C  | -0.710 | -2.915 | -1.833 | 3.515 |
| C  | 0.681  | -3.204 | -0.159 | 3.280 |
| C  | -0.288 | -4.201 | -1.873 | 4.609 |
| N  | 0.581  | -4.351 | -0.815 | 4.465 |
| C  | 1.042  | 0.782  | -2.843 | 3.127 |
| C  | 2.372  | 1.589  | -1.294 | 3.134 |
| C  | 2.004  | 1.509  | -3.468 | 4.280 |
| N  | 2.821  | 1.996  | -2.471 | 4.248 |

**Fe/S Model Final-Fit**

|    |        |        |        |       |
|----|--------|--------|--------|-------|
| Fe | 0.000  | 0.000  | 0.000  | 0.000 |
| N  | -1.751 | 0.359  | -1.151 | 2.126 |
| O  | 1.843  | -0.064 | 0.761  | 1.995 |
| S  | 0.170  | 2.429  | 0.931  | 2.607 |
| N  | 1.562  | 1.009  | -1.243 | 2.237 |
| N  | 0.044  | -2.062 | -0.562 | 2.138 |
| C  | -2.816 | 0.765  | -0.485 | 2.958 |
| C  | -2.136 | -0.018 | -2.418 | 3.227 |
| N  | -3.869 | 0.662  | -1.275 | 4.127 |
| C  | -3.473 | 0.170  | -2.501 | 4.283 |
| C  | 3.750  | -0.264 | 2.238  | 4.375 |
| C  | 2.254  | -0.366 | 1.923  | 2.985 |
| O  | 1.495  | -0.750 | 2.839  | 3.295 |
| C  | -1.138 | 3.540  | 1.148  | 3.891 |
| C  | 1.516  | 1.075  | -2.620 | 3.212 |
| C  | 2.604  | 1.707  | -0.821 | 3.220 |
| N  | 3.223  | 2.218  | -1.875 | 4.338 |
| C  | 2.562  | 1.841  | -3.023 | 4.370 |
| C  | 0.869  | -2.869 | 0.080  | 2.998 |
| C  | -0.535 | -2.749 | -1.603 | 3.226 |
| N  | 0.840  | -4.051 | -0.517 | 4.169 |
| C  | -0.036 | -4.007 | -1.580 | 4.308 |
